# Supplementary material for: Termination of non‐coding transcription in yeast relies on both an RNA Pol II CTD interaction domain and a CTD‐mimicking region in Sen1
Source: PubMed Central journal article supplement (PMC7110113; doi:10.15252/embj.2019101548), 2020-02-28
Supplement: EMBJ-39-e101548-s001.pdf [file EMBJ-39-e101548-s001.pdf]

**Termination of non-coding transcription in yeast relies on both an RNA Pol II CTD interaction domain and a CTD-mimicking region in Sen1**

Han, Z; Jasnovidova, O; Haidara, N.; Tudek, A.; Kubicek, K; Libri, D; Stefl, R and O. Porrua.

**List of supplementary material:**

- Appendix Figures S1-S6.
- Appendix Tables S1-S6.
- Supplementary references.

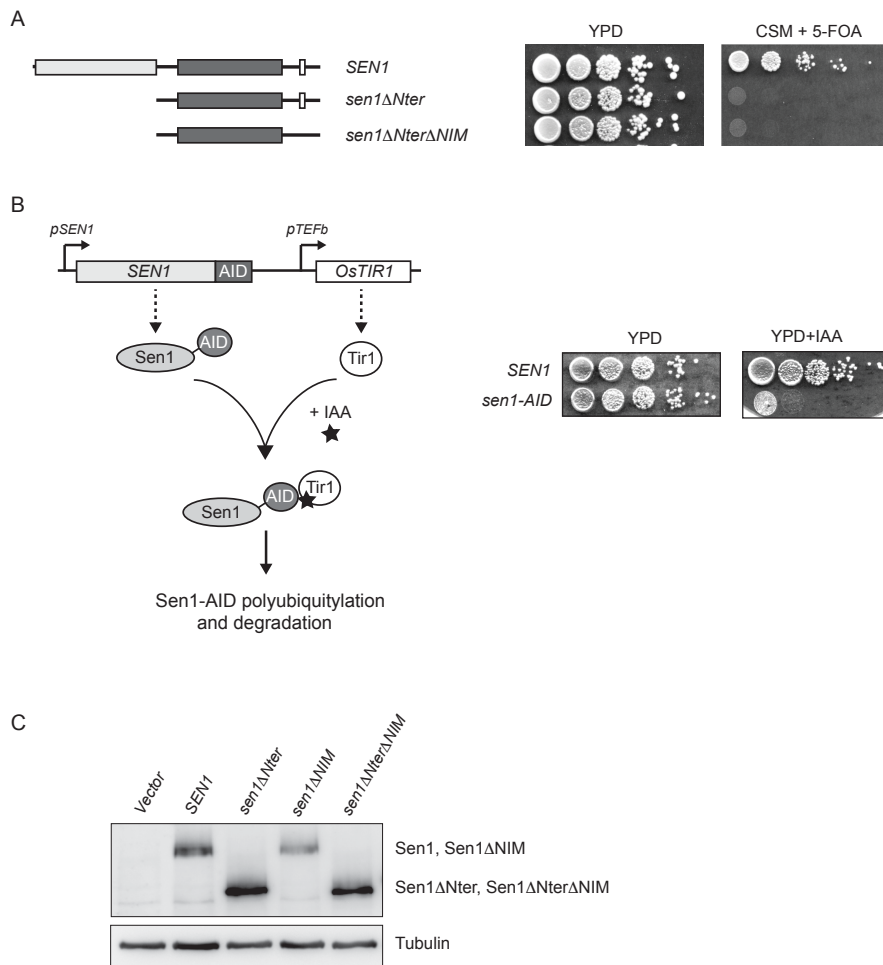

**Appendix Figure S1 (related to figure 3):** **A)** Growth tests performed as in figure 3A but using strains harbouring the TAP-tagged versions of *SEN1* indicated on the left at the endogenous locus in the presence of a *URA3* plasmid (pFL38) expressing *SEN1*. **B)** Description of the degron system employed in this study to deplete Sen1. The *SEN1* endogenous locus is modified by inserting the sequence of an AID (auxin inducible degron) tag followed by a cassette for the expression of *Oryza sativa TIR1* (*OsTIR1*), an ubiquitin ligase. In the presence of auxin hormones such as indole-3-acetic acid (IAA), Tir1 recognizes the AID-tag and promotes polyubiquitylation and subsequent degradation of Sen1-AID by the proteasome. A growth test illustrating the inhibition of cell growth upon depletion of Sen1 is shown on the right. **C)** Western blot analysis of HA-tagged versions of Sen1 expressed from a centromeric plasmid in a Sen1-AID strain upon depletion of the chromosomally-encoded copy of Sen1 as in figure 3B. Tubulin is detected as a loading control.

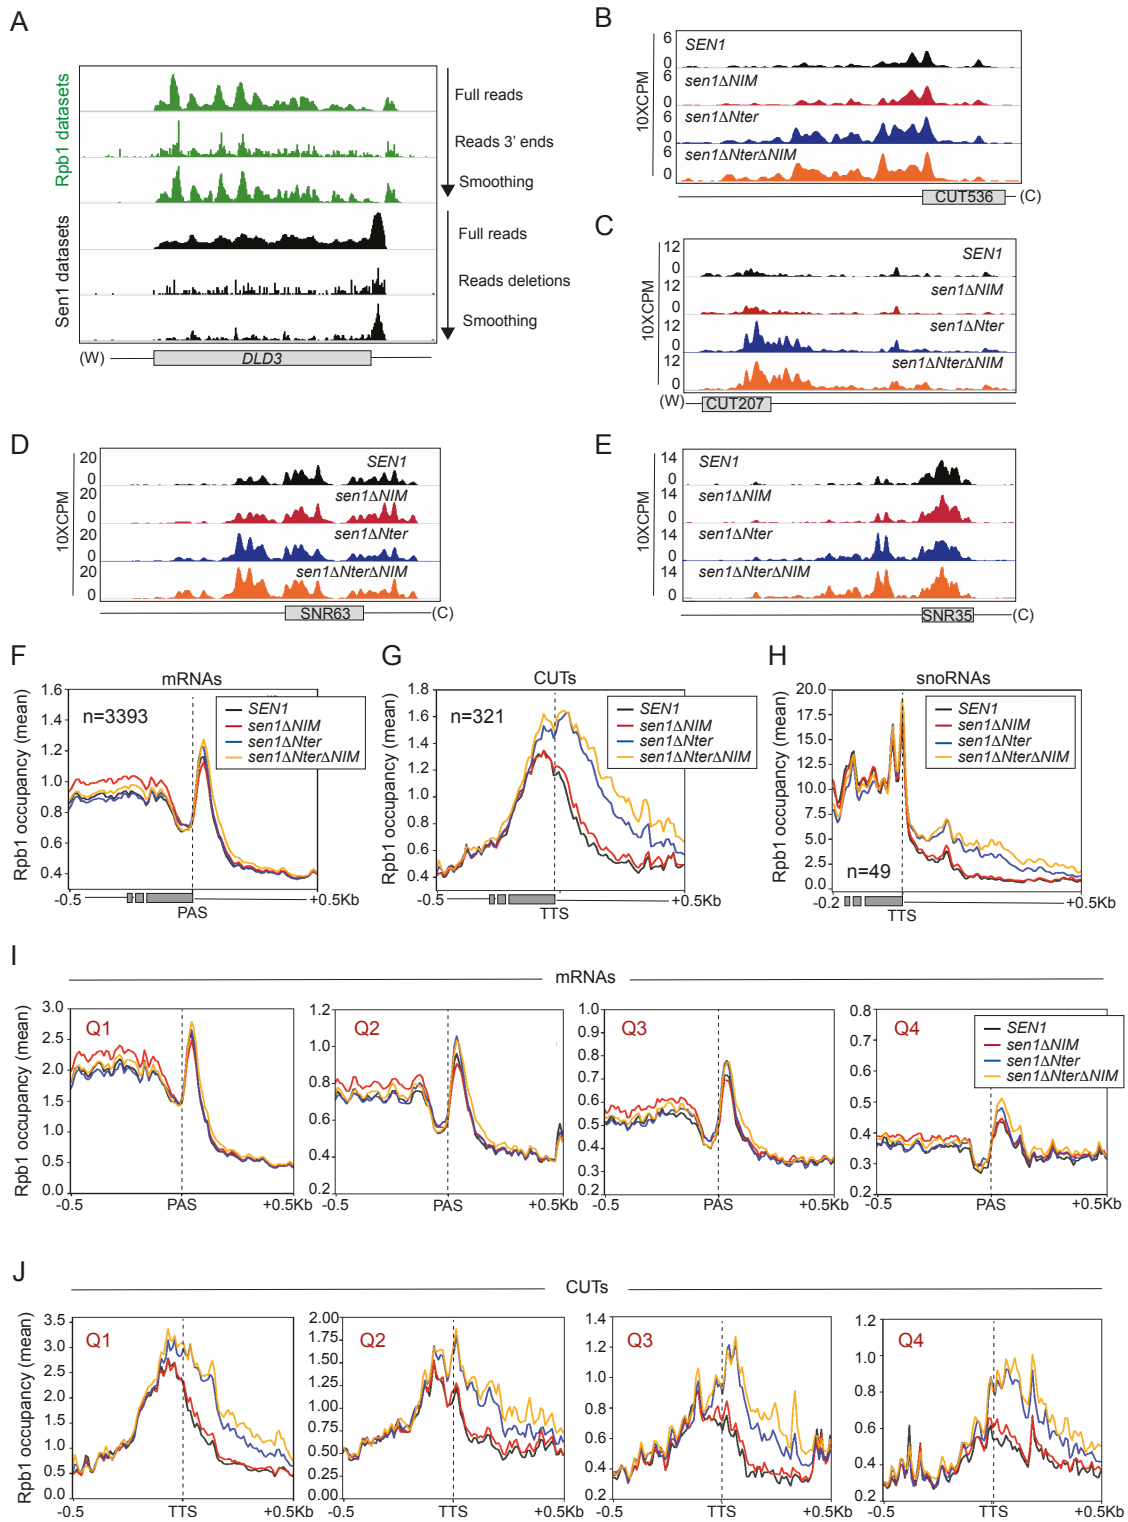

**Appendix Figure S2 (related to figure 3): A)** Screenshot of a particular mRNA to illustrate the conversions operated on RNAPII (Rpb1) and Sen1 CRAC datasets to increase resolution. **B)** and **C)** Additional examples of CUTs exhibiting transcription termination defects upon deletion of the Nter that are exacerbated in the double  $\Delta Nter\Delta NIM$  mutant. **D)** and **E)** Additional examples of snoRNAs showing transcription termination defects in Sen1 mutants. **F-H)**

Metagene analysis of the RNAPII distribution at the indicated classes of RNA in the presence of different Sen1 variants. Values on the y axis correspond to the mean coverage. Similar metagene analyses performed on quartiles for mRNAs (I) and CUTs (J), where Q1 represents the 25% of RNAs of the indicated class exhibiting the highest RNAPII occupancy in the wt.

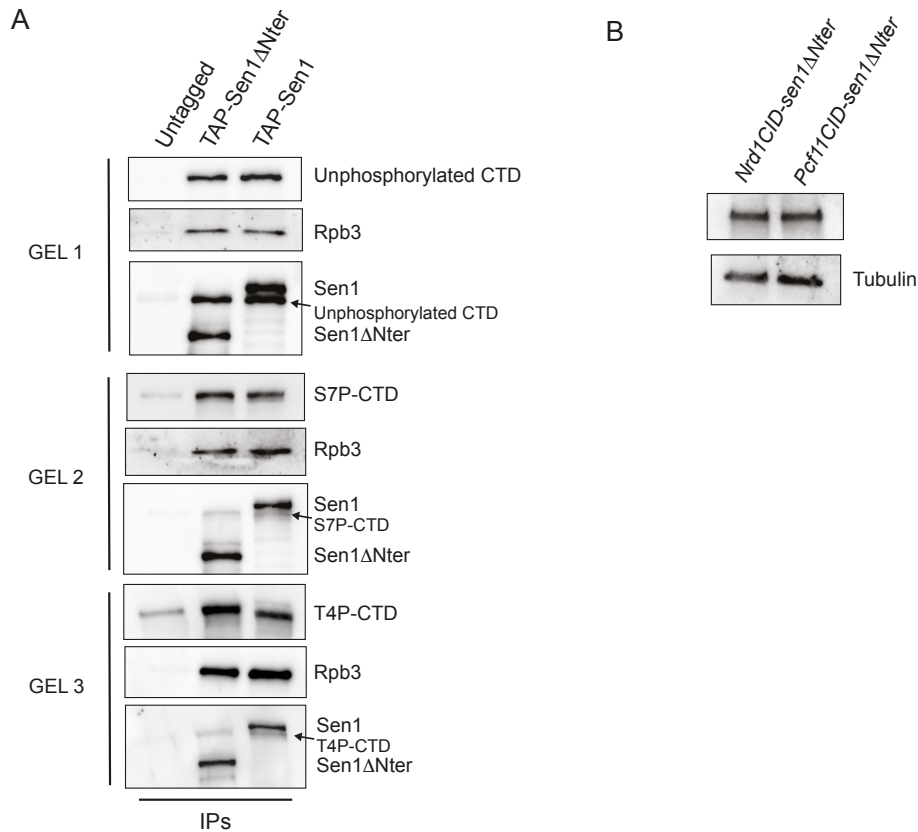

**Appendix Figure S3 (related to figure 5): A)** Deletion of the Sen1 N-terminal domain does not affect the interaction of Sen1 with the S7P-CTD or with the unphosphorylated CTD. CoIP experiments using TAP-Sen1 as the bait. Sen1 proteins were expressed from pGAL in the presence of galactose. The Rpb3 subunit of RNAPII is detected as a control. Protein extracts were treated with RNaseA before immunoprecipitation. Samples correspond to the same experiment and were loaded in three different gels run. **B)** Western blot analysis of HA-tagged versions of the chimeric Sen1 proteins indicated from a centromeric plasmid in a Sen1-AID strain upon depletion of the chromosomally-encoded copy of Sen1 as in figure 3B. Tubulin is detected as a loading control.

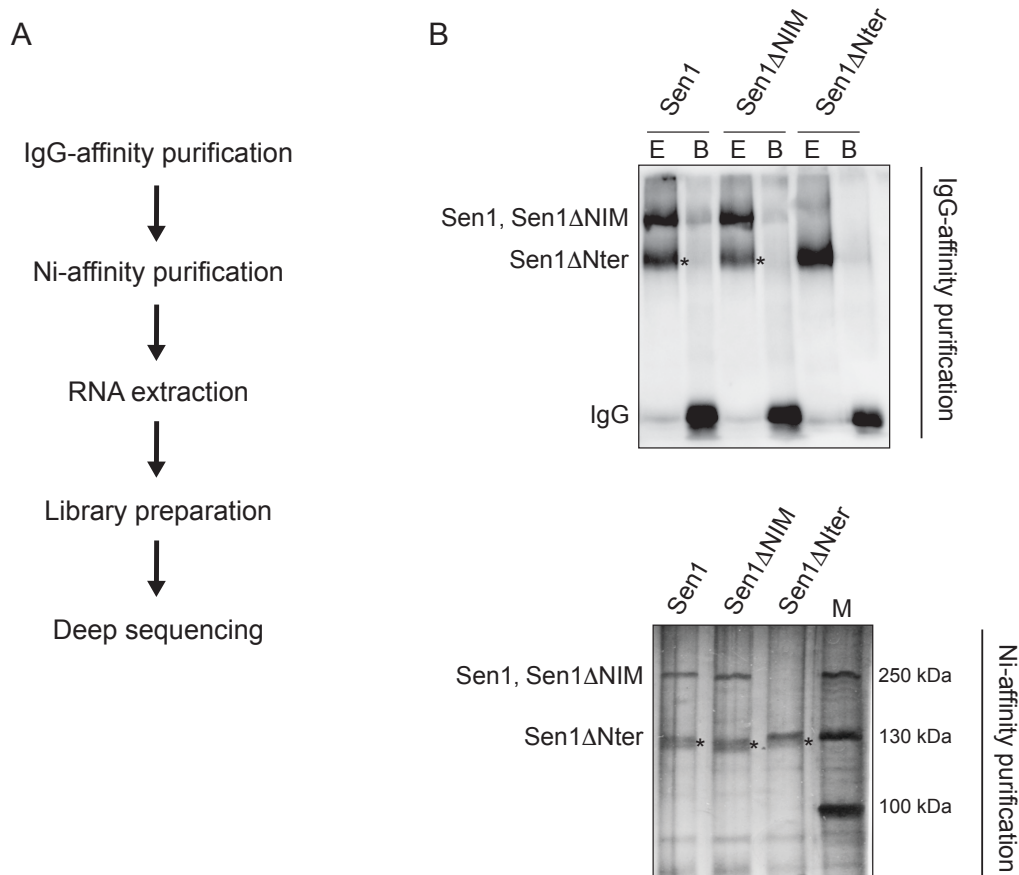

**Appendix Figure S4 (related to figure 6): A) Schematic of the main steps in a CRAC experiment. B) Results of the two purification steps of the different HTP (His<sub>6</sub>-TEV-ProteinA)-tagged Sen1 variants in a typical CRAC experiment. Representative gels corresponding to one out of two independent biological replicates. Top: western blot showing results of the IgG-affinity purification step. E, eluates after cleavage of the protein A moiety using the TEV protease. B, protein remaining associated with IgG beads. Proteins were revealed using the PAP antibody. Bottom: silver-stained denaturing gel showing the results of the Ni-affinity purification step. M, molecular-weight marker. An asterisk indicates Sen1 proteolytic fragments of size similar to that of Sen1ΔNter that we typically obtain in all Sen1 purifications.**

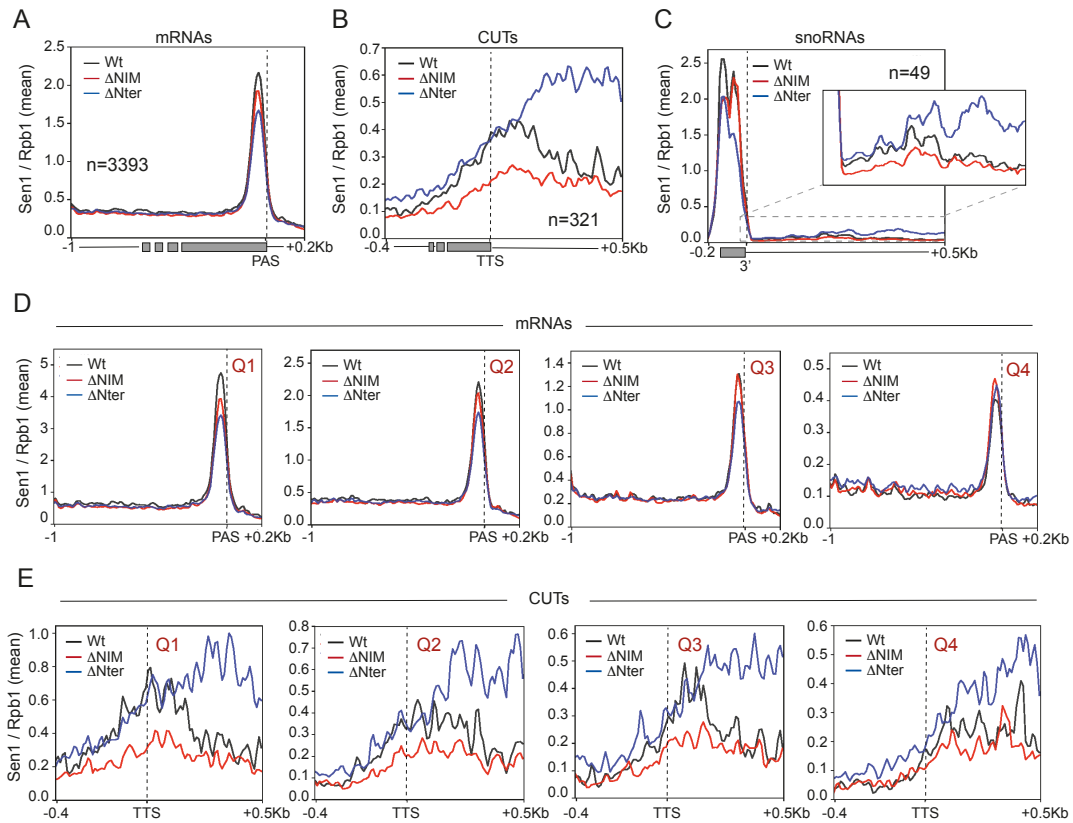

**Appendix Figure S5 (related to figure 6): A-C) Metagene analysis of the normalized distribution of different Sen1 variants at the indicated classes of RNA. Values on the y axis correspond to the mean coverage. Similar metagene analyses performed on quartiles for mRNAs (D) and CUTs (E), where Q1 represents the 25% of RNAs of the indicated class exhibiting the highest wt Sen1 occupancy.**

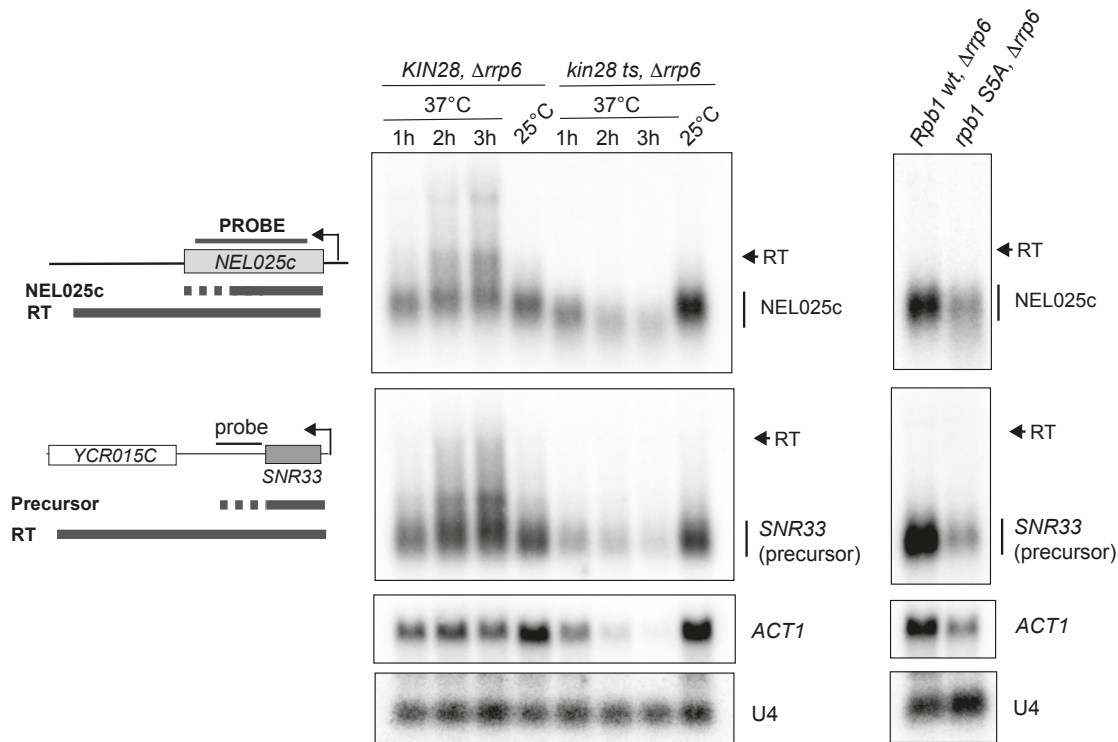

**Appendix Figure S6: Analysis of the role of S5 phosphorylation for NNS-dependent transcription termination.** Northern blot analyses of two well-characterized NNS-targets in either a *kin28* thermosensitive (*ts*) mutant (left) or a Rpb1-anchor away strain carrying a plasmid expressing either the wt or S5A versions of *RPB1* (right). Kin28 was inactivated by incubation at 37°C for the indicated times. Note that growth at 37°C induces mild termination defects in the control strain due to the presence of the *Δrrp6* mutation, which also confers a thermosensitive phenotype. The Rpb1-anchor away strains were treated for 2h with rapamycin to induce the nuclear depletion of the chromosomally-encoded Rpb1. The intermediate phenotype of this strain compared to the *kin28 ts* suggests incomplete depletion of the wt version of Rpb1 during the timeframe of the experiment. The expected RNA species resulting from inefficient termination (RT for readthrough species) are indicated. The *ACT1* mRNA is detected to provide a readout of the general decrease in transcription provoked by the inhibition of S5 phosphorylation. U4 RNA is used as a loading control. Representative gels of one out of two independent experiments. Probes used for RNA detection are described in table S14.

**Appendix Table S1:** Equilibrium binding of Nrd1 CID to Sen1 and Trf4 NIMs monitored by fluorescence anisotropy.

|              | <b>Sen1 NIM</b> | <b>Trf4 NIM</b> |
|--------------|-----------------|-----------------|
|              | Kd ( $\mu$ M)   | Kd ( $\mu$ M)   |
| <b>wt</b>    | 1.2 $\pm$ 0.02  | 0.9 $\pm$ 0.02  |
| <b>L20D</b>  | 16.9 $\pm$ 1.5  | 13.4 $\pm$ 1.2  |
| <b>K21D</b>  | 8.0 $\pm$ 0.8   | 6.1 $\pm$ 0.4   |
| <b>S25D</b>  | 76.1 $\pm$ 14.2 | 53.9 $\pm$ 8.2  |
| <b>R28D</b>  | 78.2 $\pm$ 11.5 | 63.4 $\pm$ 4.0  |
| <b>I130A</b> | 7.6 $\pm$ 0.3   | 4.5 $\pm$ 0.2   |
| <b>I130K</b> | 36.7 $\pm$ 4.6  | 14.1 $\pm$ 1.2  |
| <b>I130N</b> | 8.9 $\pm$ 0.5   | 6.1 $\pm$ 0.3   |
| <b>M126A</b> | 1.4 $\pm$ 0.07  | 1.1 $\pm$ 0.02  |
| <b>R133A</b> | 1.8 $\pm$ 0.08  | 1.4 $\pm$ 0.02  |
| <b>R133D</b> | 2.0 $\pm$ 0.1   | 1.2 $\pm$ 0.05  |
| <b>R133G</b> | 1.6 $\pm$ 0.04  | 1.3 $\pm$ 0.04  |



**Appendix Table S2: NMR and refinement statistics for the Nrd1 CID–Sen1 NIM complex**

| Nrd1 CID–Sen1 NIM complex                           |                  |
|-----------------------------------------------------|------------------|
| <b>NMR distance &amp; dihedral constraints</b>      |                  |
| Distance restraints                                 |                  |
| Total NOEs                                          | 2499             |
| Intra-residue                                       | 654              |
| Inter-residue                                       | 1845             |
| Short                                               | 1273             |
| Medium                                              | 645              |
| Long                                                | 581              |
| Hydrogen bonds                                      | 100              |
| Intermolecular distance restraints                  | 65               |
| Total dihedral angle restraints <sup>a</sup>        | 222              |
| <b>Structure statistics<sup>b</sup></b>             |                  |
| Violations (mean and s.d.)                          |                  |
| Number of distance restraint violations > 0.5 Å     | 0.05 ± 0.22      |
| Number of dihedral angle restraint violations > 15° | 1.1 ± 1.2        |
| Max. dihedral angle restraint violation (°)         | 29.03 ± 27.63    |
| Max. distance constraint violation (Å)              | 0.027 ± 0.12     |
| Deviations from idealized geometry <sup>b</sup>     |                  |
| Bond lengths (Å)                                    | 0.0037 ± 0.00008 |
| Bond angles (°)                                     | 1.673 ± 0.013    |
| Average pairwise r.m.s.d (Å) <sup>b</sup>           |                  |
| Nrd1 CID (6-82,91-135,143-147,149-153)              |                  |
| Heavy atoms                                         | 1.1              |
| Backbone atoms                                      | 0.7              |
| Sen1 NIM (2052-2063)                                |                  |
| Heavy atoms                                         | 1.9              |
| Backbone atoms                                      | 1.3              |
| Complex                                             |                  |
| All complex heavy atoms                             | 2.5              |
| All complex backbone atoms                          | 2.0              |
| Ramachandran plot statistics <sup>c</sup>           |                  |
| Residues in most favoured regions (%)               | 96.7             |
| Residues in allowed regions (%)                     | 3.2              |
| Residues in generously allowed regions (%)          | 0.1              |
| Residues in disallowed regions (%)                  | 0.0              |

<sup>a</sup>  $\alpha$ -helical dihedral angle restraints imposed for the backbone based on the CSI.

<sup>b</sup> Calculated for an ensemble of the 20 lowest energy structures.

<sup>c</sup> Based on Procheck analysis (Laskowski et al., 1996).

**Appendix Table S3:** Antibodies used in this work.

| <b>Name</b>                                | <b>Reference/provider</b>              | <b>Working dilution</b> | <b>Use</b>                                                                 |
|--------------------------------------------|----------------------------------------|-------------------------|----------------------------------------------------------------------------|
| Anti-HA F7                                 | Sc-7392/ Santa Cruz                    | 1:1000                  | Sen1-HA detection in figures 1A, 1C-D, 5A                                  |
| Anti-HA 12CA5                              | 11 666 606 001/<br>Sigma               | 2.5 ug/reaction         | Sen1 colP in figure 1D                                                     |
| Anti-CBP,<br>calmodulin<br>binding protein | 07-482/ Millipore                      | 1:1000                  | Nrd-CBP detection in figure 1A,<br>Sen1-CBP detection in figure 5B         |
| Anti-Air2                                  | S. Vanacova                            | 1:1000                  | Air2 detection in figure 1A                                                |
| Anti-Rpb1 y80                              | Santa Cruz (not<br>available any more) | 1:1000                  | Rpb1 detection in figure 5A, 5B                                            |
| Anti-phospho-<br>CTD Ser5 clone<br>3E8     | 04-1572/ Millipore                     | 1:1000                  | Detection of S5P-CTD of RNAP<br>II in figure 5B                            |
| Anti-phospho-<br>CTD Ser2 clone<br>3E10    | 04-1571/ Millipore                     | 1:1000                  | Detection of S2P-CTD of RNAP<br>II in figure 5B                            |
| Anti-phospho-<br>CTD Ser7 clone<br>4E12    | 04-1570/ Millipore                     | 1:1000                  | Detection of S7P-CTD of RNAP<br>II in figure S3                            |
| Anti-phospho-<br>CTD Thr4 clone            | 61362/Active motif                     | 1:500                   | Detection of T4P-CTD of RNAP<br>II in Appendix Figure S3                   |
| Anti-CTD<br>8WG16                          | Ab817/abcam                            | 1:1000                  | Detection of the<br>unphosphorylated CTD<br>preferentially.                |
| PAP,<br>peroxidase anti-<br>peroxidase     | P1291-1ML/ Sigma                       | 1:3000                  | Used for Protein A detection on<br>TAP tag.                                |
| Anti-Nrd1                                  | Covalab                                | 1:3000                  | Nrd1 detection in figures 1 and 5                                          |
| Anti-Nab3                                  | Covalab                                | 1:3000                  | Nab3 detection in figures 1 and<br>5                                       |
| Anti-His                                   | H1029, Sigma                           | 1:2000                  | His <sub>6</sub> -GST-Sen1 Cter and His <sub>6</sub> -<br>GST in figure 5E |

**Appendix Table S4:** Yeast strains used in this work.

| Number  | Name                                          | Genotype                                                             | Source                       |
|---------|-----------------------------------------------|----------------------------------------------------------------------|------------------------------|
| DLY17   | W303                                          | <i>ura3-1, ade2-1, his3-11,5, trp1-1, leu2-3,112, can1-100</i>       | (Thomas and Rothstein, 1989) |
| DLY467  | KIN28                                         | <i>kin28::URA, [pSF19-KIN28, CEN, TRP]</i>                           | (Cismowski et al., 1995)     |
| DLY468  | kin28 ts16                                    | <i>kin28::URA, [pSF19-kin28-ts16 CEN, TRP]</i>                       | (Cismowski et al., 1995)     |
| DLY671  | BMA                                           | <i>as W303, Δtrp1</i>                                                | F. Lacroute                  |
| DLY814  | <i>Δrrp6</i>                                  | <i>as W303, rrp6::KAN</i>                                            | (Porrua et al., 2012)        |
| DLY1657 | <i>sen1-HA</i>                                | <i>as BMA, Sen1::HA::KAN</i>                                         | (Tudek et al, 2014)          |
| DLY2014 | <i>nrd1 ΔCID-TAP, sen1-HA</i>                 | <i>as BMA, nrd1ΔCID (Δ6-150)::TAP::HIS3</i>                          | Tudek et al, 2014            |
| DLY2769 | <i>sen1ΔNIM</i>                               | <i>as BMA, sen1ΔNIM (Δ2052-2063)</i>                                 | This work                    |
| DLY2982 | <i>sen1ΔNIM-HA</i>                            | <i>as BMA, sen1ΔNIM (Δ2052-2063)::HA::KAN</i>                        | This work                    |
| DLY1737 | <i>nrd1-TAP, sen1-HA</i>                      | <i>as BMA, NRD1::TAP::HIS5 Sen1::HA::KAN</i>                         | (Tudek et al, 2014)          |
| DLY2622 | <i>nrd1-TAP, sen1ΔNIM-HA</i>                  | <i>as BMA, NRD1::TAP::HIS5, sen1ΔNIM (Δ2052-2063)::HA::KAN</i>       | This work                    |
| DLY2657 | <i>sen1ΔCter-HA</i>                           | <i>as BMA, sen1ΔCter (Δ1930-2231)::HA::KAN</i>                       | This work                    |
| DLY2658 | <i>nrd1-TAP, sen1ΔCter-HA</i>                 | <i>as BMA, NRD1::TAP::HIS5, sen1ΔCter (Δ1930-2231)::HA::KAN</i>      | This work                    |
| DLY2695 | <i>sen1ΔCter-HA, Δrrp6</i>                    | <i>as BMA, sen1ΔCter (Δ1930-2231)::HA::KAN, rrp6::URA</i>            | This work                    |
| DLY2694 | <i>sen1-HA, Δrrp6</i>                         | <i>as BMA, sen1::HA::KAN, rrp6::URA</i>                              | This work                    |
| DLY2770 | <i>sen1ΔNIM, Δrrp6</i>                        | <i>as BMA, sen1ΔNIM, rrp6::KAN</i>                                   | This work                    |
| DLY2767 | <i>Δsen1/pFL38-SEN1</i>                       | <i>as BMA, sen1::KAN, harbouring plasmid pFL38-SEN1</i>              | This work                    |
| DLY1656 | <i>P<sub>GAL1</sub>- TAP-SEN1</i>             | <i>as BMA, TRP1::Pgal::TAP::SEN1</i>                                 | (Porrua et al., 2012)        |
| DLY2778 | <i>P<sub>GAL1</sub>- TAP-sen1ΔNIM</i>         | <i>as BMA, TRP1::Pgal::TAP::sen1ΔNIM (Δ2052-2063)</i>                | This work                    |
| DLY2692 | <i>P<sub>GAL1</sub>- TAP-sen1ΔNter</i>        | <i>as BMA, TRP1::Pgal::TAP::sen1ΔNter (Δ1-975)</i>                   | This work                    |
| DLY2779 | <i>P<sub>GAL1</sub>- TAP-sen1ΔNter ΔNIM</i>   | <i>as BMA, TRP1::Pgal::TAP::sen1ΔNter (Δ1-975) ΔNIM (Δ2052-2063)</i> | This work                    |
| DLY2060 | <i>P<sub>GAL1</sub>- TAP-SEN1, Δrrp6</i>      | <i>as BMA, TRP1::Pgal::TAP::SEN1, rrp6::KAN</i>                      | (Porrua et al., 2012)        |
| DLY2780 | <i>P<sub>GAL1</sub>- TAP-sen1ΔNIM, Δrrp6</i>  | <i>as BMA, TRP1::Pgal::TAP::sen1ΔNIM (Δ2052-2063), rrp6::KAN</i>     | This work                    |
| DLY2698 | <i>P<sub>GAL1</sub>- TAP-sen1ΔNter, Δrrp6</i> | <i>as BMA, TRP1::Pgal::TAP::sen1ΔNter (Δ1-975), rrp6::KAN</i>        | This work                    |

|         |                                                      |                                                                                                                                                                                 |                       |
|---------|------------------------------------------------------|---------------------------------------------------------------------------------------------------------------------------------------------------------------------------------|-----------------------|
| DLY2781 | <i>P<sub>GAL1</sub>-TAP-sen1ΔNterΔNIM, Δrrp6</i>     | as BMA, TRP1::Pgal::TAP::sen1ΔNter (Δ1-975) ΔNIM (Δ2052-2063), rrp6::KAN                                                                                                        | This work             |
| DLY2782 | <i>sen1-AID</i>                                      | as BMA, SEN1-AID::KAN::OsTIR1                                                                                                                                                   | This work             |
| DLY2788 | <i>sen1-AID, Δrrp6</i>                               | as BMA, SEN1-AID::KAN::OsTIR1, rrp6::URA                                                                                                                                        | This work             |
| DLY2724 | <i>TAP-sen1/pFL38-SEN1</i>                           | as BMA, TAP::SEN1, harbouring plasmid pFL38-SEN1                                                                                                                                | This work             |
| DLY2725 | <i>TAP- sen1ΔNter /pFL38-SEN1</i>                    | TAP::sen1ΔNter (Δ1-975), harbouring plasmid pFL38-SEN1                                                                                                                          | This work             |
| DLY2726 | <i>TAP- sen1ΔNterΔNIM /pFL38-SEN1</i>                | as BMA, TAP::sen1ΔNter (Δ1-975) ΔNIM (Δ2052-2063), harbouring plasmid pFL38-SEN1                                                                                                | This work             |
| DLY3152 | <i>P<sub>GAL1</sub>-TAP-SEN1, Δnrd1/ pRS316-NRD1</i> | as BMA, TRP1::Pgal::TAP::SEN1, nrd1::KAN; harbouring plasmid pRS316-NRD1                                                                                                        | This work             |
| DLY3187 | <i>P<sub>GAL1</sub>-TAP-SEN1, Δnab3/ pFL38-Nab3</i>  | as BMA, TRP1::Pgal::TAP::SEN1, nab3::KAN; harbouring plasmid pFL38-NAB3                                                                                                         | This work             |
| DLY3081 | <i>rpb3-FLAG</i>                                     | as BMA, RPB3::3xFLAG::natMX6                                                                                                                                                    | This work             |
| DLY3151 | <i>rpb3-FLAG, sen1-AID</i>                           | as BMA, SEN1-AID:KAN::OsTIR1, RPB3::3xFLAG::natMX6                                                                                                                              | This work             |
| DLY3361 | <i>sen1-AID, rpb1-HTP</i>                            | as BMA, Sen1::AID, KAN::OsTIR1, rpb1-HTP::URA                                                                                                                                   | This work             |
| yFR1499 | Rpb1 anchor away + Rpb1-CTD wt-3xFLAG                | <i>ade2-1, trp1-1, can1-100, leu2-3,112, his3-11,15, ura3, GAL, psi+, tor1-1, fpr1Δ::NAT, RPL13A-2xFKBP12::TRP1, RPB1-FRB::KanMX6, [pFR482 (CEN, HIS3, RPB1-CTDWT-3xFLAG)]</i>  | (Collin et al., 2019) |
| yFR1503 | Rpb1 anchor away + Rpb1-CTD S5A-3xFLAG               | <i>ade2-1, trp1-1, can1-100, leu2-3,112, his3-11,15, ura3, GAL, psi+, tor1-1, fpr1Δ::NAT, RPL13A-2xFKBP12::TRP1, RPB1-FRB::KanMX6, [pFR490 (CEN, HIS3, rpb1-CTDS5A-3xFLAG)]</i> | (Collin et al., 2019) |
| DLY3423 | <i>Δrrp6, Rpb1 anchor away + Rpb1-CTD wt-3xFLAG</i>  | as yFR1499, rrp6::URA                                                                                                                                                           | This work             |
| DLY3424 | <i>Δrrp6, Rpb1 anchor away + Rpb1-CTD S5A-3xFLAG</i> | as yFR1503, rrp6::URA                                                                                                                                                           | This work             |
| DLY3417 | <i>KIN28, Δrrp6</i>                                  | as YDL467, rrp6::KAN                                                                                                                                                            | This work             |
| DLY3419 | <i>kin28 ts16, Δrrp6</i>                             | as YDL468, rrp6::KAN                                                                                                                                                            | This work             |

**Appendix Table S5:** plasmids used in this work.

| Name             | Description                                                                                                                                                              | Source                      |
|------------------|--------------------------------------------------------------------------------------------------------------------------------------------------------------------------|-----------------------------|
| pBS1761          | Ap <sup>r</sup> ; <i>oriColE1</i> ; plasmid bearing cassette for N-terminal tagging with PGAL1-TAP                                                                       | (Finoux and Séraphin, 2006) |
| pDL708 (pU6H3HA) | Ap <sup>r</sup> ; <i>oriColE1</i> ; plasmid bearing cassette for C-terminal tagging with HA                                                                              | (Finoux and Séraphin, 2006) |
| pDL772           | Ap <sup>r</sup> ; <i>oriColE1</i> ; derivative of pFL38 (URA) bearing yeast <i>SEN1</i>                                                                                  | F. Lacroute                 |
| pDL693           | Ap <sup>r</sup> ; <i>oriColE1</i> ; derivative of pFL39 bearing yeast <i>SEN1</i>                                                                                        | F. Lacroute                 |
| pDL703           | Ap <sup>r</sup> ; <i>oriColE1</i> ; derivative of pFL39 bearing <i>sen1ΔNIM</i>                                                                                          | This work                   |
| pETM30           | Kan <sup>r</sup> ; <i>oriColE1</i> ; vector for overexpression of proteins from the T7 promoter                                                                          | R. Stefl                    |
| pDL834           | Ap <sup>r</sup> ; <i>oriColE1</i> ; derivative of pFL39 bearing <i>sen1ΔNter</i>                                                                                         | This work                   |
| pDL835           | Ap <sup>r</sup> ; <i>oriColE1</i> ; derivative of pFL39 bearing <i>sen1ΔNterΔNIM</i>                                                                                     | This work                   |
| pDL846           | Kan <sup>r</sup> ; <i>oriColE1</i> ; derivative of pETM30 carrying the C-terminal domain of Sen1 (aa 1931-2231) under the control of the T7 promoter                     | This work                   |
| pDL848           | Kan <sup>r</sup> ; <i>oriColE1</i> ; derivative of pETM30 carrying the ΔNIM version of the C-terminal domain of Sen1 (aa 1931-2231) under the control of the T7 promoter | This work                   |
| pDL856           | Ap <sup>r</sup> ; <i>oriColE1</i> ; derivative of pFL39 bearing yeast <i>sen1-HA</i>                                                                                     | This work                   |
| pDL858           | Ap <sup>r</sup> ; <i>oriColE1</i> ; derivative of pFL39 bearing <i>sen1ΔNIM-HA</i>                                                                                       | This work                   |
| pDL857           | Ap <sup>r</sup> ; <i>oriColE1</i> ; derivative of pFL39 bearing <i>sen1ΔNter-HA</i>                                                                                      | This work                   |
| pDL859           | Ap <sup>r</sup> ; <i>oriColE1</i> ; derivative of pFL39 bearing <i>sen1ΔNterΔNIM-HA</i>                                                                                  | This work                   |
| pDL876           | Ap <sup>r</sup> ; <i>oriColE1</i> ; derivative of pFL39 bearing the chimeric <i>nrd1CID</i> (aa 1-153) - <i>sen1ΔNter</i>                                                | This work                   |
| pDL887           | Ap <sup>r</sup> ; <i>oriColE1</i> ; derivative of pFL39 bearing the chimeric <i>nrd1CID</i> (aa 1-153) - <i>sen1ΔNter-HA</i>                                             | This work                   |
| pDL965           | Ap <sup>r</sup> ; <i>oriColE1</i> ; derivative of pFL39 bearing the chimeric <i>pcf11CID</i> (aa 1-137) - <i>sen1ΔNter</i>                                               | This work                   |
| pDL966           | Ap <sup>r</sup> ; <i>oriColE1</i> ; derivative of pFL39 bearing yeast <i>sen1-HTP</i>                                                                                    | This work                   |
| pDL967           | Ap <sup>r</sup> ; <i>oriColE1</i> ; derivative of pFL39 bearing yeast <i>sen1ΔNIM-HTP</i>                                                                                | This work                   |
| pDL968           | Ap <sup>r</sup> ; <i>oriColE1</i> ; derivative of pFL39 bearing yeast <i>sen1ΔNter-HTP</i>                                                                               | This work                   |
| pDL991           | Ap <sup>r</sup> ; <i>oriColE1</i> ; derivative of pFL39 bearing the chimeric <i>pcf11CID</i> (aa 1-137) - <i>sen1ΔNter-HA</i>                                            | This work                   |
| pRS_NC           | Ap <sup>r</sup> ; <i>oriColE1</i> ; plasmid bearing CID-His6 under the control of the T7 promoter                                                                        | (Kubicek et al., 2012)      |
| pRS_NC_L20D      | Kan <sup>r</sup> ; <i>oriColE1</i> ; plasmid bearing CID(L20D)-His6 under the control of the T7 promoter                                                                 | (Vasiljeva et al., 2008)    |
| pRS_NC_K21D      | Kan <sup>r</sup> ; <i>oriColE1</i> ; plasmid bearing CID(K21D)-His6 under the control of the T7 promoter                                                                 | (Vasiljeva et al., 2008)    |
| pRS_NC_S25R      | Ap <sup>r</sup> ; <i>oriColE1</i> ; plasmid bearing CID(S25R)-His6 under the control of the T7 promoter                                                                  | (Kubicek et al., 2012)      |
| pRS_NC_R28D      | Ap <sup>r</sup> ; <i>oriColE1</i> ; plasmid bearing CID(R28D)-His6 under the control of the T7 promoter                                                                  | (Kubicek et al., 2012)      |
| pRS_NC_I130A     | Ap <sup>r</sup> ; <i>oriColE1</i> ; plasmid bearing CID(I130A)-His6 under the control of the T7 promoter                                                                 | (Tudek et al., 2014)        |
| pRS_NC_I130K     | Ap <sup>r</sup> ; <i>oriColE1</i> ; plasmid bearing CID(I130K)-His6 under the control of the T7 promoter                                                                 | (Tudek et al., 2014)        |
| pRS_NC_I130N     | Ap <sup>r</sup> ; <i>oriColE1</i> ; plasmid bearing CID(I130N)-His6 under the control of the T7 promoter                                                                 | (Tudek et al., 2014)        |
| pRS_NC_R133A     | Ap <sup>r</sup> ; <i>oriColE1</i> ; plasmid bearing CID(R133A)-His6 under the control of the T7 promoter                                                                 | (Tudek et al., 2014)        |
| pRS_NC_R133G     | Ap <sup>r</sup> ; <i>oriColE1</i> ; plasmid bearing CID(R133G)-His6 under the control of the T7 promoter                                                                 | This work                   |
| pRS_NC_R133D     | Ap <sup>r</sup> ; <i>oriColE1</i> ; plasmid bearing CID(R133D)-His6 under the control of the T7 promoter                                                                 | This work                   |

**Appendix Table S6: List of oligonucleotides used in this work.**

| <b>Name</b> | <b>Sequence (5'-3')</b>                             | <b>Information/use</b>                                                                       |
|-------------|-----------------------------------------------------|----------------------------------------------------------------------------------------------|
| DL1119      | AAGTGACGAAGTTCATGCTA                                | Forward oligo to generate by PCR a probe to detect snR13 read-through region.                |
| DL1367      | GGCCCAACAGTATATTCATATCC                             | Reverse oligo to generate by PCR a probe to detect snR13 read-through region.                |
| DL474       | GCAAAGATCTGTATGAAAGG                                | Forward oligo to generate by PCR a probe to detect NEL025C.                                  |
| DL480       | ATCTGACCAGGTCAAGCTAC                                | Reverse oligo to generate by PCR a probe to detect NEL025C.                                  |
| DL2505      | GTGTGTGGACAATCGATTTGC                               | Forward oligo to generate by PCR a probe to detect snR33 3'precursor and read-through region |
| DL2506      | GCATTGGCTCGATTGTCAAC                                | Reverse oligo to generate by PCR a probe to detect snR33 3'precursor and read-through region |
| DL1154      | CCTATAACAACAACAACATG                                | Forward oligo to generate by PCR a probe to detect snR47 RNA.                                |
| DL1157      | ATAGCCATTAGTAAGTACGC                                | Reverse oligo to generate by PCR a probe to detect snR47 RNA.                                |
| DL2627      | ATTCAAAGCGAACACCGAATTGAC<br>CATGAGGAGACGGTCTGGTTTAT | Reverse oligo used as oligo probe to detect U4 snRNA                                         |
| DL377       | ATGTTCCCAGGTATTGCCGA                                | Forward oligo to generate by PCR a probe to detect <i>ACT1</i> RNA.                          |
| DL378       | ACACTTGTGGTGAACGATAG                                | Reverse oligo to generate by PCR a probe to detect <i>ACT1</i> RNA.                          |

### **Supplementary references:**

Cismowski, M.J., Laff, G.M., Solomon, M.J., and Reed, S.I. (1995). KIN28 encodes a C-terminal domain kinase that controls mRNA transcription in *Saccharomyces cerevisiae* but lacks cyclin-dependent kinase-activating kinase (CAK) activity. *Mol. Cell. Biol.* *15*, 2983–2992.

Finoux, A.-L., and Séraphin, B. (2006). In vivo targeting of the yeast Pop2 deadenylase subunit to reporter transcripts induces their rapid degradation and generates new decay intermediates. *J. Biol. Chem.* *281*, 25940–25947.

Laskowski, R.A., Rullmann, J.A., MacArthur, M.W., Kaptein, R., and Thornton, J.M. (1996). AQUA and PROCHECK-NMR: programs for checking the quality of protein structures solved by NMR. *J. Biomol. NMR* *8*, 477–486.

Thomas, B.J., and Rothstein, R. (1989). The genetic control of direct-repeat recombination in *Saccharomyces*: the effect of *rad52* and *rad1* on mitotic recombination at *GAL10*, a transcriptionally regulated gene. *Genetics* *123*, 725–738.
